# Supplementary material for: Functional Capacity of Patients with Advanced Gastrointestinal and Breast Cancer Pre-treatment - a Cross-Sectional Comparison to Healthy Age-matched Women
Source: Research Square preprint supplement (doi:10.21203/rs.3.rs-585931/v1), 2021-07-07
Supplement: Supplementary file 1 [file 81c6338bb460a8bde2b94152.docx]

Supplementary table 1: Inclusion and exclusion criteria of the study

| **Inclusion criteria** | **Exclusion criteria** |
| --- | --- |
| - Patients with histologically confirmed advanced gastrointestinal cancer (stage III – IV) - Scheduled first-line chemotherapeutic treatment (chemotherapy naïve) - Age ≥50 years - Written informed consent - Ability to understand and speak german as well as to understand the study protocol - Oncologist’s approval for study participation | - ECOG > 2 - Acute or chronic infectious disease - any medical condition limiting participation in physical activity and/or exercise - Systemic diseases (e.g. multiple sclerosis, ) that restrict mobility and elevate fall and injury risk during physical activity - Inability to stand and walk - Disorders (neurological, skeletal, muscular, metabolic, peripheral vascular, mental or cognitive) or medication used independently of the cancer disease (e.g. analgesics, muscle relaxants) that might influence gait, balance and muscle strength - Untreated hypertension (diastolic pressure > 95mmHg) - Vestibulopathies and uncorrected visual deficits |
