# Supplementary material for: Functional Capacity of Patients with Advanced Gastrointestinal and Breast Cancer Pre-treatment - a Cross-Sectional Comparison to Healthy Age-matched Women
Source: Research Square preprint supplement (doi:10.21203/rs.3.rs-585931/v1), 2021-07-07
Supplement: Supplementary file 2 [file 8bcf54a59aebcd93cb721a81.docx]

Supplementary table 2: characteristics: mean ± standard deviation (SD)

|  |  | **control** | **GIT** | **breast** | **p-value** |
| --- | --- | --- | --- | --- | --- |
| **Age** | mean+SD | 68.6±5.8 | 68.4 ± 5.6 | 64.1 ±7.8 | 0.9 |
| **BMI** | mean+SD | 24.6 ± 3.2 | 24.0 ± 5.1 | 23.6 ± 3.7 | 0.7 |
